# Supplementary material for: Facile synthesis of a class of aminochromene–aniliniumion conjugated far-red to near-infrared fluorescent dyes for bioimaging
Source: Royal Society of Chemistry journal article supplement (doi:10.1039/c4tb01592d), 2014-11-19
Supplement: c4tb01592d1.pdf [file c4tb01592d1.pdf]

*Supporting information for*

## **Facile Synthesis of a Class of Aminochromene-aniliniumion Conjugated Far-Red to Near-Infrared Fluorescent Dyes for Bioimaging**

Kaibo Zheng,<sup>b</sup> Weiyang Lin,<sup>a, b, \*</sup> Weimin Huang<sup>b</sup>, Xiaoyu Guan,<sup>b</sup>  
Dan Cheng,<sup>b</sup> and Jian-Yong Wang<sup>a</sup>

<sup>a</sup> Institute of Fluorescent Probes for Biological Imaging, University of Jinan, Jinan, Shandong 250022, P.R. China.

<sup>b</sup> State Key Laboratory of Chemo/Biosensing and Chemometrics, College of Chemistry and Chemical Engineering, Hunan University, Changsha, Hunan 410082, P. R. China.

E-mail: [weiyanglin2013@163.com](mailto:weiyanglin2013@163.com)

|                                                   | Page   |
|---------------------------------------------------|--------|
| 1. Calculation of fluorescence quantum yield..... | S2     |
| 2. Figures S1-S2.....                             | S2     |
| 3. Figures S3-S4.....                             | S3     |
| 4. Figures S5-S6.....                             | S4     |
| 5. Figures S7-S8.....                             | S5     |
| 6. Table S1-3.....                                | S6-S7  |
| 7. Figures S9.....                                | S7     |
| 8. References.....                                | S7     |
| 8. Figures S10-17.....                            | S8-S11 |

## Determination of the fluorescence quantum yield

Fluorescence quantum yields for ACA-1~4 were determined by using ICG ( $\Phi_f = 0.13$  in DMSO) as a fluorescence standard.<sup>1</sup> The quantum yield was calculated using the following equation:

$$\Phi_{F(X)} = \Phi_{F(S)} (A_S F_X / A_X F_S) (n_X / n_S)^2$$

Where  $\Phi_F$  is the fluorescence quantum yield,  $A$  is the absorbance at the excitation wavelength,  $F$  is the area under the corrected emission curve, and  $n$  is the refractive index of the solvents used. Subscripts  $S$  and  $X$  refer to the standard and to the unknown, respectively.

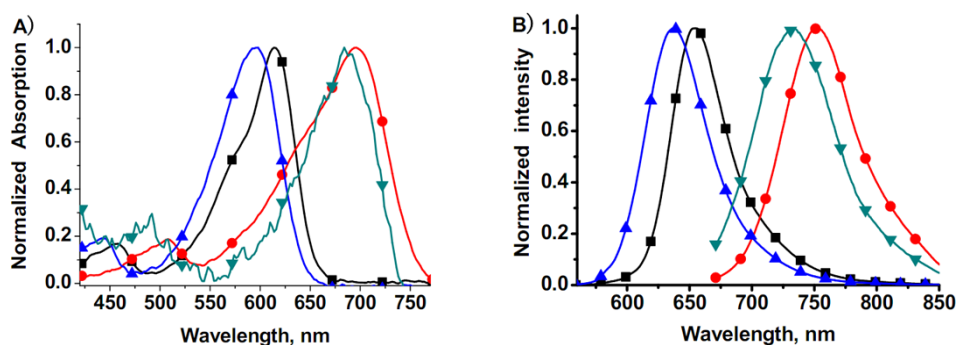

**Fig. S1.** A) Absorption spectra of the dyes; B) Emission spectra of the dyes; ACA-1 (■), ACA-2 (●), ACA-3 (▲) and ACA-4 (▼) in CH<sub>2</sub>Cl<sub>2</sub>.

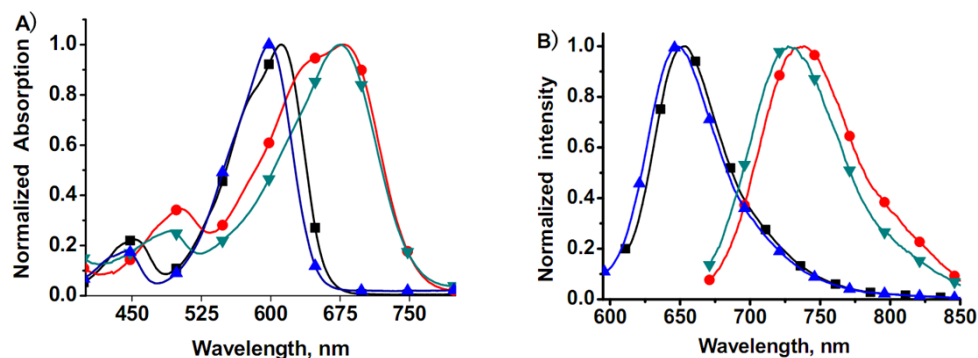

**Fig. S2.** A) Absorption spectra of the dyes; B) Emission spectra of the dyes; ACA-1 (■), ACA-2 (●), ACA-3 (▲), and ACA-4 (▼) in pH 7.4, 25 mM PBS buffer (containing 0.5 mg/mL BSA).

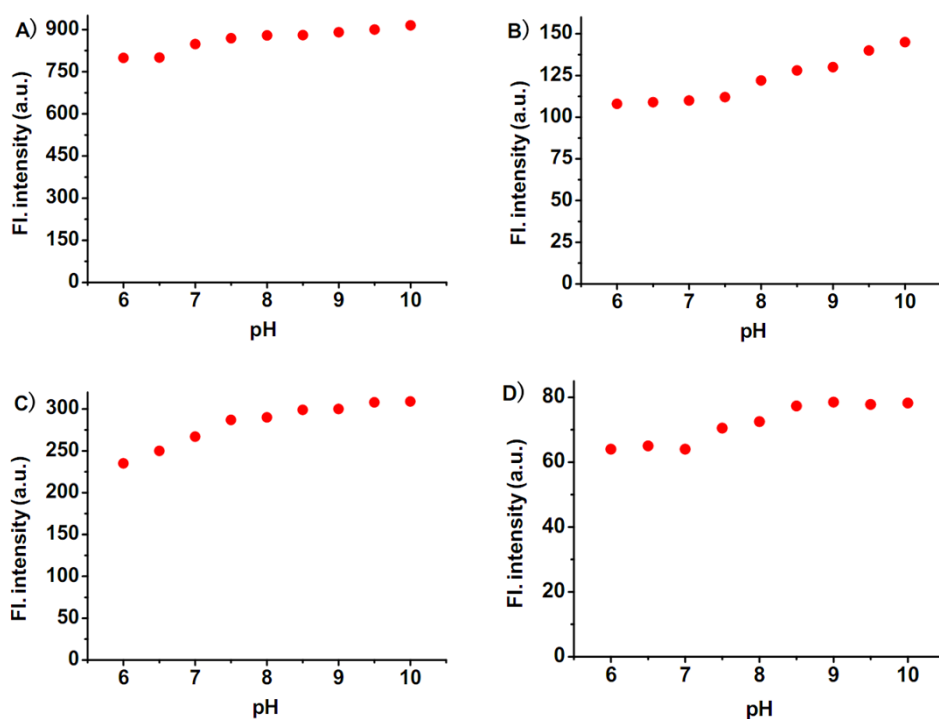

**Fig. S3** pH-dependence of the fluorescence intensity of the dyes: A (ACA-1), B (ACA-2), C (ACA-3), and D (ACA-4).

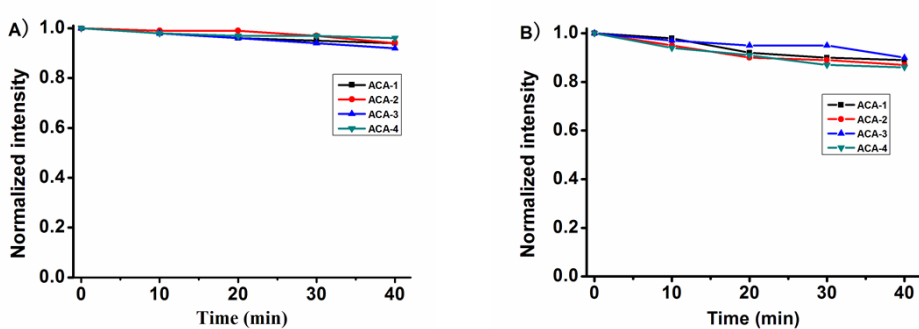

**Fig. S4.** Photostability of ACA-1 (■), ACA-2 (●), ACA-3 (▲), and ACA-4 (▼) in pH 7.4, 25 mM PBS buffer (containing 0.5 mg/mL BSA). The samples were continuously irradiated by UV light (365 nm) (A) and 500W Xe lamp (B).

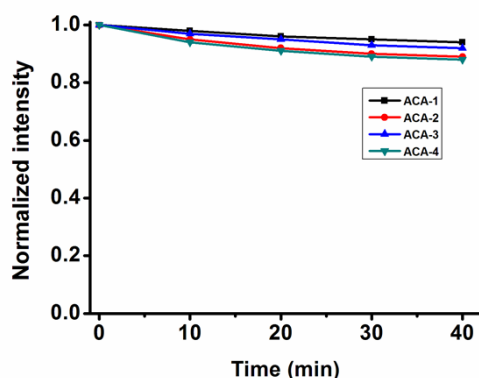

**Fig. S5** Photostability of ACA-1 (■), ACA-2 (●), ACA-3 (▲), and ACA-4 (▼) in pH 7.4, 25 mM PBS buffer. The samples were continuously irradiated by UV light (365 nm).

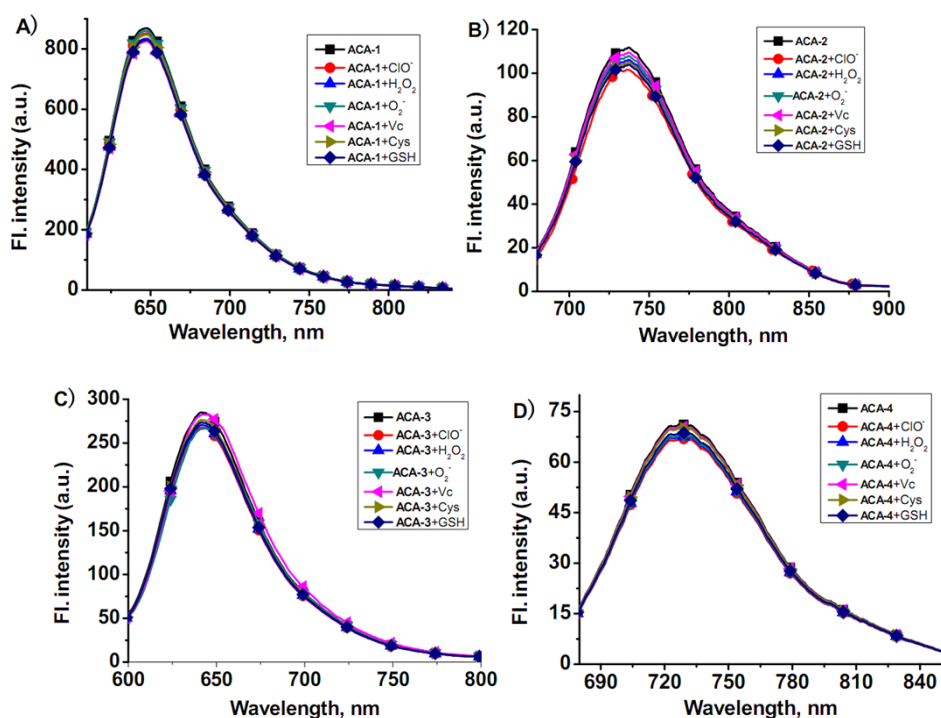

**Fig. S6** Fluorescence spectra of a 5  $\mu$ M solution of ACA-1~4 before and after reaction with various the representative oxidizing and reducing reagents for 30 min, A (ACA-1), B (ACA-2), C (ACA-3) and D (ACA-4).

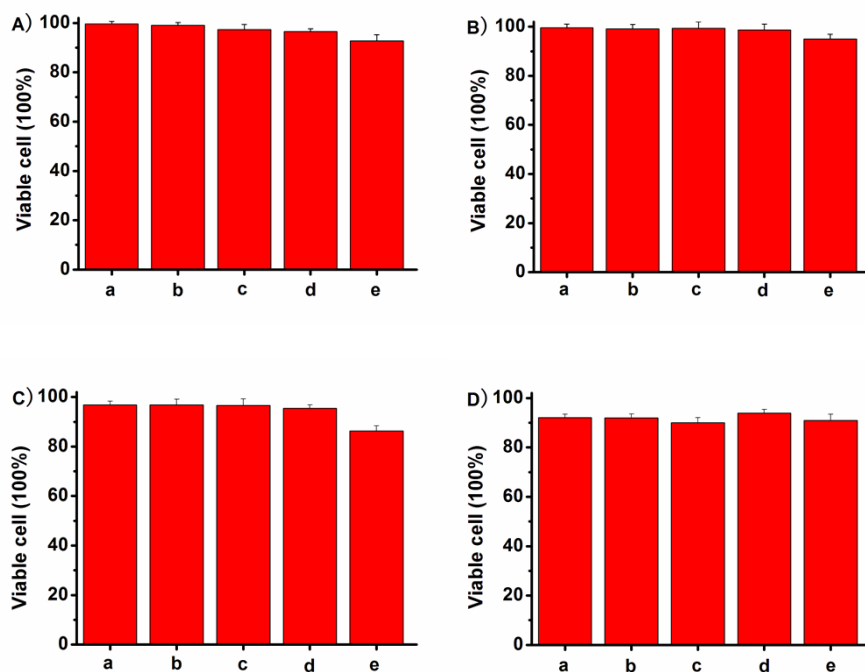

**Fig. S7** Cytotoxicity assays of ACA-1~4 at different concentrations (a: 0  $\mu\text{M}$ ; b: 2  $\mu\text{M}$ ; c: 5  $\mu\text{M}$ ; d: 10  $\mu\text{M}$ ; e: 20  $\mu\text{M}$ ) for HeLa cells.

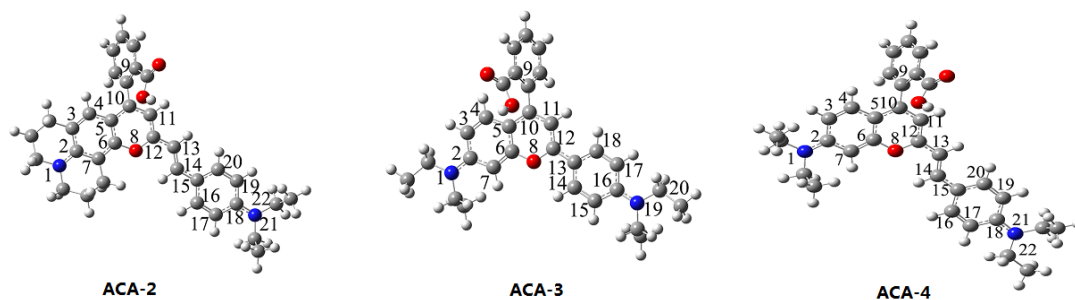

**Fig. S8** DFT optimized structure of ACA-2~4. In the ball-and-stick representation, carbon, nitrogen, and oxygen atoms are colored in gray, blue, and red, respectively. H atoms were omitted for clarity.

**Table S1.** Representative C-C (N or O) Bond Lengths (in pm) of **ACA-2** determined by DFT Calculations.

| C-C Bond | Bond Lengths (in pm) | C-C Bond | Bond Lengths (in pm) | C-C/N/O Bond | Bond Lengths (in pm) |
|----------|----------------------|----------|----------------------|--------------|----------------------|
| C2-C3    | 144.2                | C12-C13  | 141.8                | C2-N1        | 136.3                |
| C3-C4    | 137.3                | C13-C14  | 137.5                | C6-O8        | 142.4                |
| C4-C5    | 141.8                | C14-C15  | 142.9                | C12-O8       | 135.4                |
| C5-C6    | 141.9                | C15-C16  | 141.8                | C18-N21      | 136.5                |
| C6-C7    | 138.7                | C16-C17  | 137.9                | C22-N21      | 147.1                |
| C2-C7    | 142.5                | C17-C18  | 142.7                |              |                      |
| C5-C10   | 141.6                | C18-C19  | 143.1                |              |                      |
| C9-C10   | 149.4                | C19-C20  | 137.7                |              |                      |
| C10-C11  | 139.0                | C15-C20  | 141.9                |              |                      |
| C11-C12  | 139.9                |          |                      |              |                      |

**Table S2.** Representative C-C (N or O) Bond Lengths (in pm) of **ACA-3** determined by DFT Calculations.

| C-C Bond | Bond Lengths (in pm) | C-C Bond | Bond Lengths (in pm) | C-C/N/O Bond | Bond Lengths (in pm) |
|----------|----------------------|----------|----------------------|--------------|----------------------|
| C2-C3    | 143.8                | C11-C12  | 140.0                | C2-N1        | 136.5                |
| C3-C4    | 137.3                | C12-C13  | 143.4                | C6-O8        | 137.1                |
| C4-C5    | 141.8                | C13-C14  | 141.8                | C12-O8       | 135.2                |
| C5-C6    | 141.7                | C14-C15  | 137.6                | C16-N19      | 136.4                |
| C6-C7    | 138.1                | C15-C16  | 143.0                | C20-N19      | 148.1                |
| C2-C7    | 142.0                | C16-C17  | 143.0                |              |                      |
| C5-C10   | 142.0                | C17-C18  | 137.8                |              |                      |
| C9-C10   | 149.1                | C13-C18  | 141.7                |              |                      |
| C10-C11  | 139.1                |          |                      |              |                      |

**Table S3.** Representative C-C (N or O) Bond Lengths (in pm) of **ACA-4** Determined by DFT Calculations.

| C-C Bond | Bond Lengths (in pm) | C-C Bond | Bond Lengths (in pm) | C-C/N/O Bond | Bond Lengths (in pm) |
|----------|----------------------|----------|----------------------|--------------|----------------------|
| C2-C3    | 143.6                | C12-C13  | 141.5                | C2-N1        | 136.4                |
| C3-C4    | 137.3                | C13-C14  | 137.7                | C6-O8        | 137.1                |
| C4-C5    | 141.8                | C14-C15  | 142.7                | C12-O8       | 135.5                |
| C5-C6    | 141.8                | C15-C16  | 141.8                | C18-N21      | 136.6                |
| C6-C7    | 138.2                | C16-C17  | 137.9                | C22-N21      | 147.1                |
| C2-C7    | 141.9                | C17-C18  | 142.8                |              |                      |
| C5-C10   | 142.2                | C18-C19  | 143.2                |              |                      |
| C9-C10   | 149.2                | C19-C20  | 137.5                |              |                      |
| C10-C11  | 138.8                | C15-C20  | 142.1                |              |                      |
| C11-C12  | 140.2                |          |                      |              |                      |

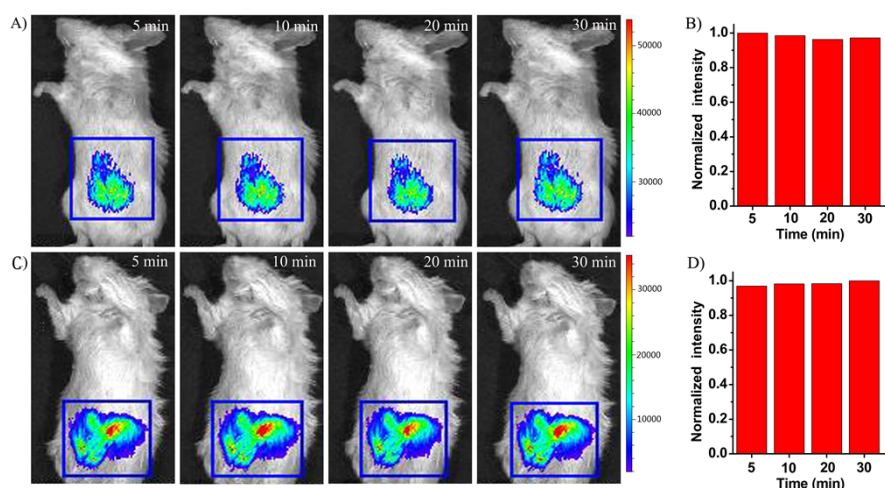

**Figure S9.** Time-lapsed (5, 10, 20 and 30 min) *in vivo* imaging of the mice with the dyes **ACA-2** (A) and **ACA-4** (C).

Reference:

- (a) R. C. Benson, H. A. Kues. *J. Chem. Eng. Data.*, 1977, **22**, 379-383; (b) D. Oushiki, H. Kojima, T. Terai, M. Arita, K. Hanaoka, Y. Urano, T. Nagano, *J. Am. Chem. Soc.*, 2010, **132**, 2795-2801.

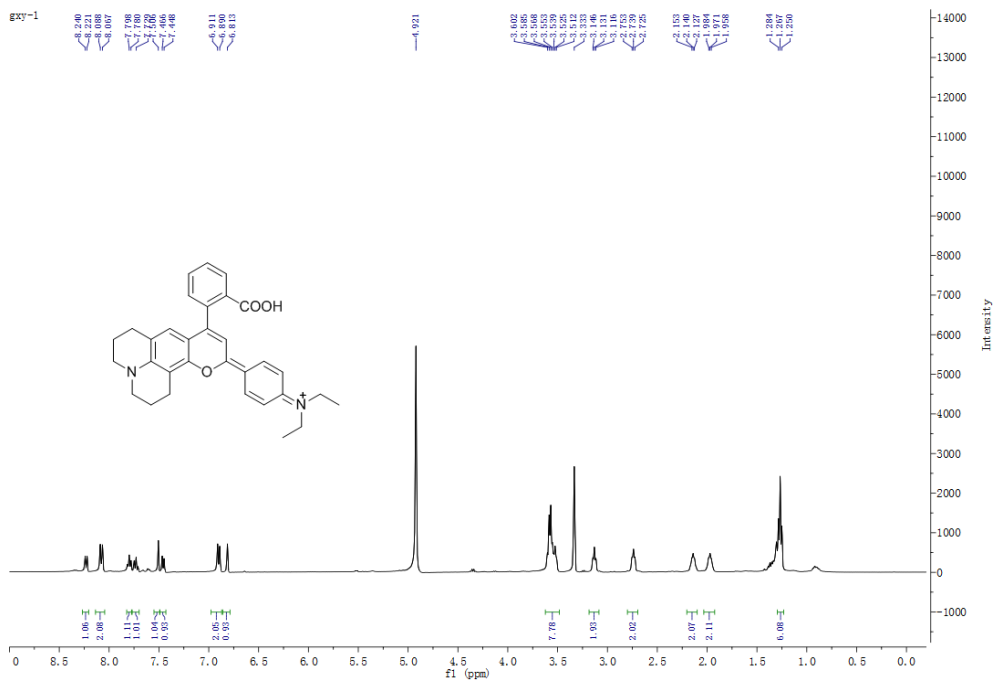

Fig. S10. <sup>1</sup>H NMR spectrum of the compound ACA-1.

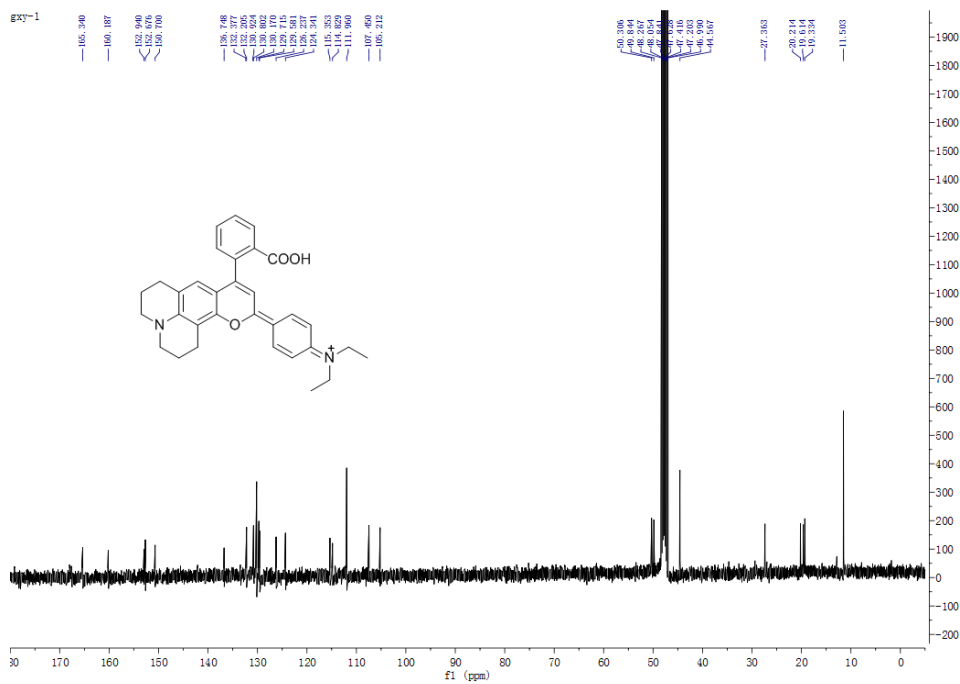

Fig. S11. <sup>13</sup>C NMR spectrum of the compound ACA-1.



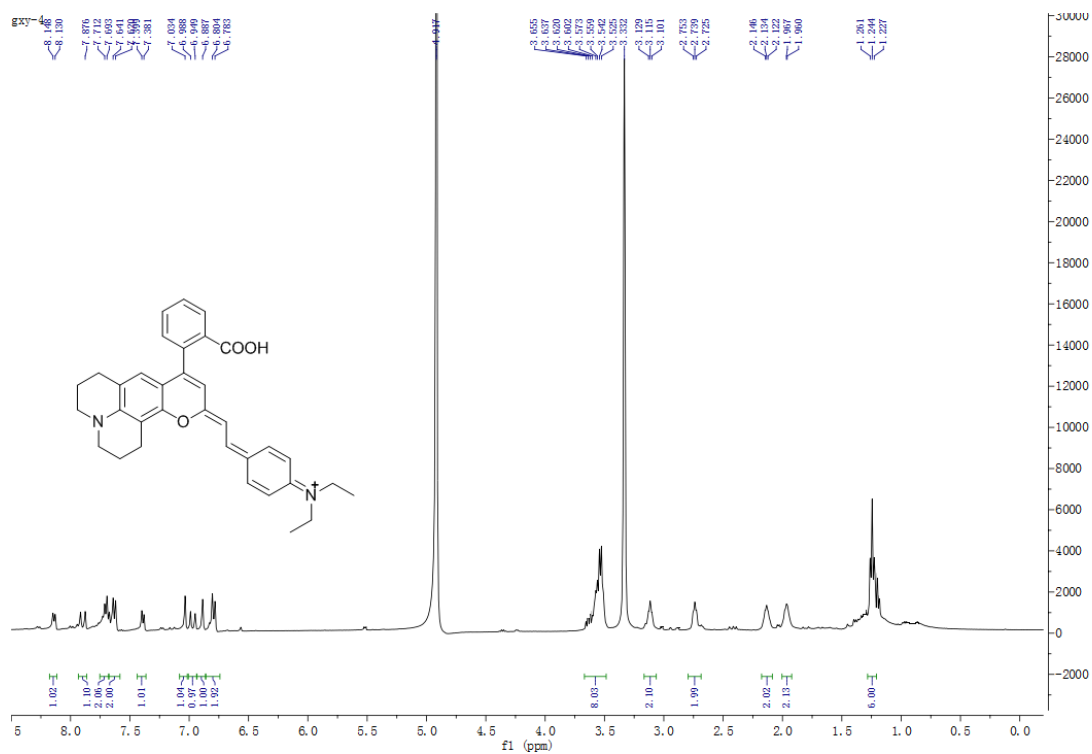

Fig. S12.  $^1\text{H}$  NMR spectrum of the compound ACA-2.

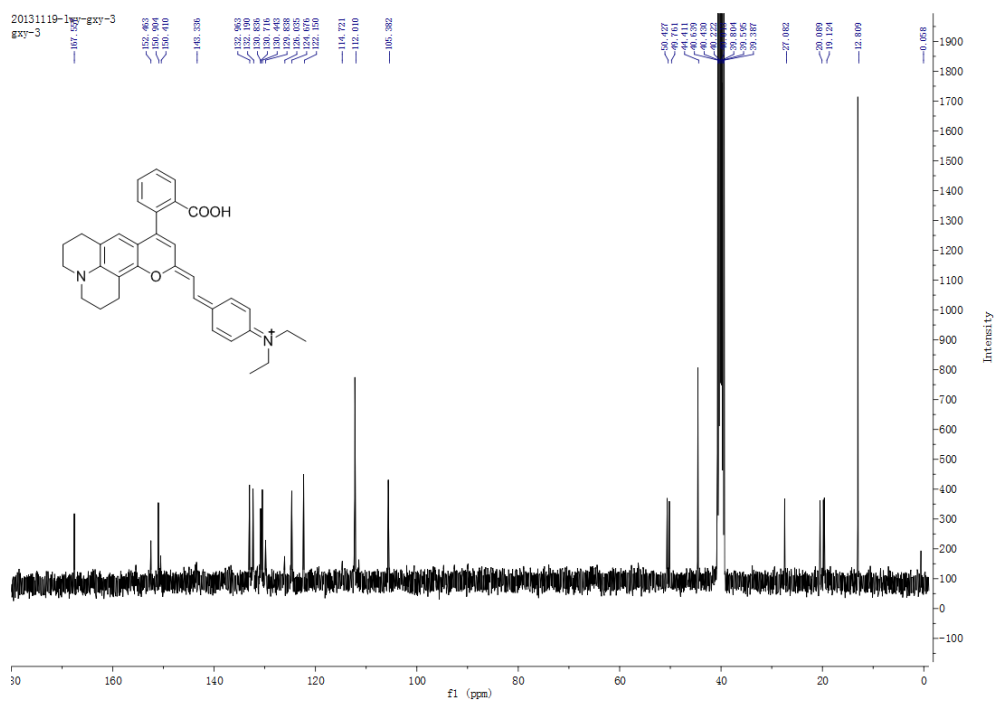

Fig. S13.  $^{13}\text{C}$  NMR spectrum of the compound ACA-2.

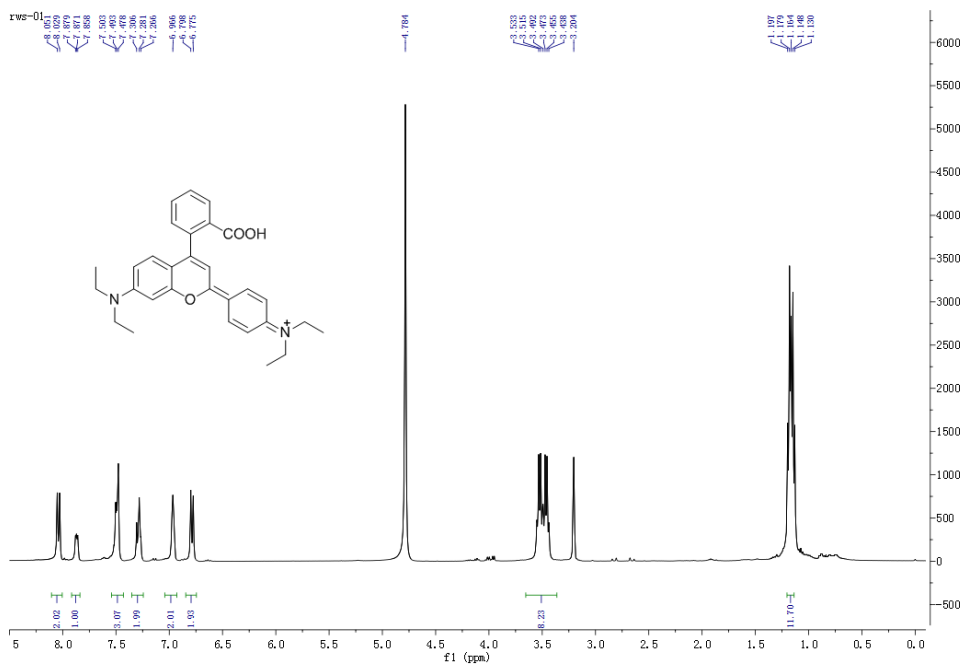

Fig.S14.  $^1\text{H}$  NMR spectrum of the compound ACA-3.

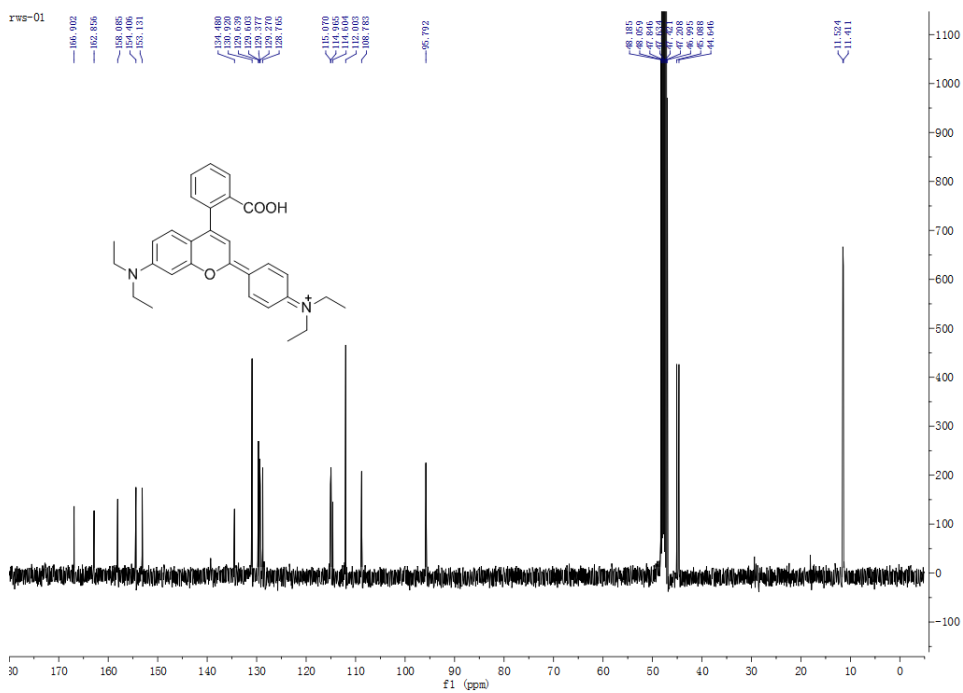

Fig.S15.  $^{13}\text{C}$  NMR spectrum of the compound ACA-3.

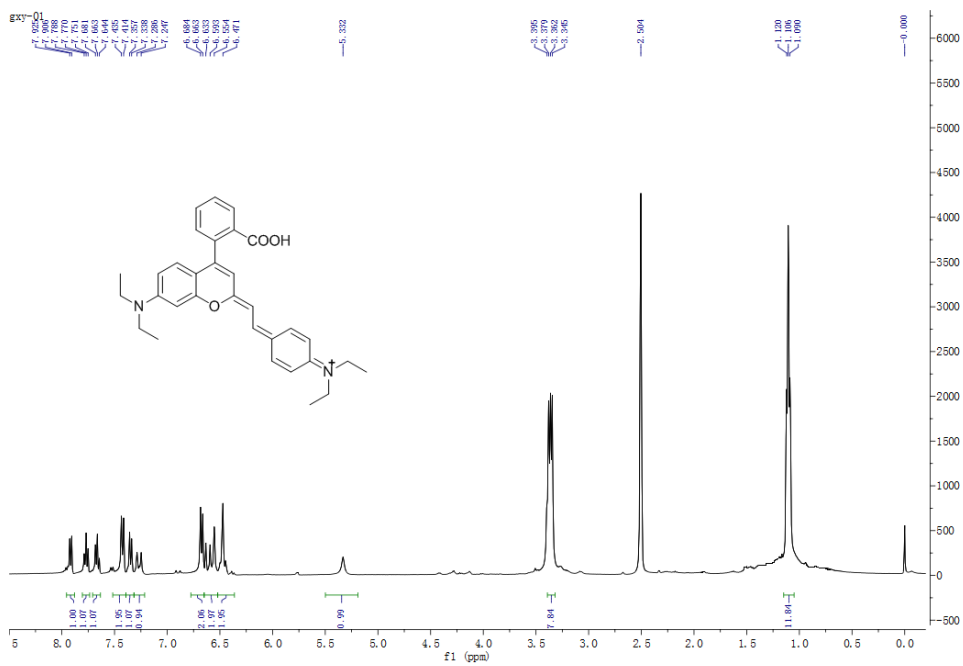

Fig. S16. <sup>1</sup>H NMR spectrum of the compound ACA-4.

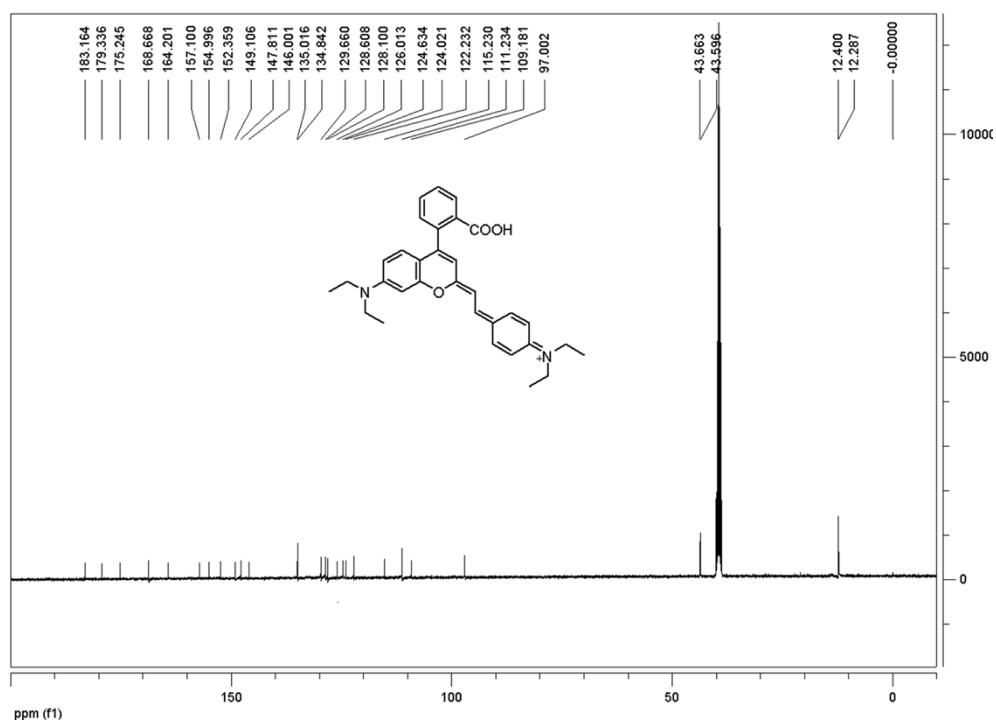

Fig. S17. <sup>13</sup>C NMR spectrum of the compound ACA-4.
